# Supplementary material
Source: Research Square preprint supplement (doi:10.21203/rs.3.rs-9230849/v1)
Supplement: Supplementary file 1 [file 3eec5be8d46f35776000c396.xlsx]

## Sheet: Sheet1
	Sa	Sq
Original surface	1.92	5.7
Rotary jet-polished surface	1.26	1.82
Vacuum-assisted rotary jet polishing surface	1.36	1.87
