# Supplementary material
Source: Research Square preprint supplement (doi:10.21203/rs.3.rs-9230849/v1)
Supplement: Supplementary file 1 [file 49228ea36fecc7a1eb571076.docx]

1. A negative-pressure rotating jet nozzle for the ultra-smooth polishing of calcium fluoride (CaF2) crystals has been proposed.
2. This nozzle effectively suppresses turbulence and stabilizes the jet flow field.
3. The surface roughness (Sz) of calcium fluoride crystals was reduced from 457 nm to 33 nm.
4. This method significantly improves the surface flatness of optical crystals.
