# Supplementary material
Source: Research Square preprint supplement (doi:10.21203/rs.3.rs-9230849/v1)
Supplement: Supplementary file 3 [file a748693baa1686ac939f2de7.xlsx]

## Sheet: Sheet1
	Sp	Sv	Sz
Original surface	309	-148	457
Rotary jet-polished surface	29.9	-17.3	47.2
Vacuum-assisted rotary jet polishing surface	16.9	-16.1	33
